# Supplementary material for: Co-Occurrence of Beckwith–Wiedemann Syndrome and Early-Onset Colorectal Cancer
Source: MDPI journal article supplement (doi:10.3390/cancers15071944), 2023-03-23
Supplement: s1 [file s1]

**Table S3.** Primers for expression analysis.

| Gene            | Primers                                     |
|-----------------|---------------------------------------------|
| <i>KCNQ1OT1</i> | Forward:5'- AGCCAGACAGAAGCCCAATA-3'         |
|                 | Reverse:5'- TGGCCTAACATATCATCCCTCC-3'       |
| <i>KCNQ1</i>    | Forward:<br>5'- AACACACAGAAGGGGACTGC-3'     |
|                 | Reverse:<br>5'- GCCTGTGATTCTCCACGTTT-3'     |
| <i>CDKN1C</i>   | Forward:<br>5'- AGAGATCAGCGCCTGAGAAG-3'     |
|                 | Reverse:<br>5'- CACCTGGGACCAGTGTACC-3'      |
| <i>GAPDH</i>    | Forward:<br>5'-TCTCCTCTGACTTCAACAGCGACA-3'  |
|                 | Reverse:<br>5'- CCCTGTTGCTGTAGCCAAATTCGT-3' |
