# Supplementary material for: Co-Occurrence of Beckwith–Wiedemann Syndrome and Early-Onset Colorectal Cancer
Source: MDPI journal article supplement (doi:10.3390/cancers15071944), 2023-03-23
Supplement: s1 [file s1]

**Table S1.** Primers for pyrosequencing analysis.

| DMR                                                   | Primers                                                    | N° CpGs analysed | Genomic Coordinates (hg19)           |
|-------------------------------------------------------|------------------------------------------------------------|------------------|--------------------------------------|
| <b><i>H19/IGF2:IG - DMR</i></b>                       | Forward:<br>5'-Biotin/ GTGGTTTTTATGACTGTTTTATTTTGGATGA-3'  | 5                | Chr11:<br>2,021,880-<br>2,022,088    |
|                                                       | Reverse:<br>5'-ACTTCCCCTTCAATCTCACCA -3'                   |                  |                                      |
|                                                       | Sequencing:<br>5'-TACAAAATTAATTATAACTATAAAAAT-3'           |                  |                                      |
| <b><i>IGF2:alt-TSS- DMR</i></b>                       | Forward:<br>5'-TGAGGATGGGTTTTTGT-3'                        | 6                | Chr11:<br>2,169,328-<br>2,169,581    |
|                                                       | Reverse:<br>5'- Biotin/ CCTCCATCCACCCAAAATAATAT-3'         |                  |                                      |
|                                                       | Sequencing:<br>5'-GGGGTGGAGGGTGTA-3'                       |                  |                                      |
| <b><i>KCNQ1OT1:TSS -DMR</i></b>                       | Forward:<br>5'-GGAGAGTATTGTTTAGGTTAGGTTGTAT -3'            | 9                | Chr11:<br>2,720,485-<br>2,720,644    |
|                                                       | Reverse:<br>5' Biotin/CCTCCCCATCTCTCTAAAAAAATTTAA-3'       |                  |                                      |
|                                                       | Sequencing:<br>5'-GGTTAGGTTGTATTGTTG-3'                    |                  |                                      |
| <b><i>GNAS-AS1:TSS- DMR</i></b>                       | Forward:<br>5'-TAGGTTGTAGTGGGGTTAAAGGA-3'                  | 8                | Chr20:<br>57,426,890-<br>57,427,116  |
|                                                       | Reverse:<br>5'-Biotin/ACCTCAAAATTTCCCAAATCCTACTATTCT-3'    |                  |                                      |
|                                                       | Sequencing:<br>5'-GTGGGGTTAAAGGAG-3'                       |                  |                                      |
| <b><i>MEST:-alt-TSS- DMR</i></b>                      | Forward:<br>5'-Biotin/AATAAGGGGGTTTTGTTTTTTTAAT-3'         | 8                | Chr7:<br>130,131,089-<br>130,131,334 |
|                                                       | Reverse:<br>5'-AACCCACCACCAAATAAT-3'                       |                  |                                      |
|                                                       | Sequencing:<br>5'-TAACCACTATAACCAAATTAC-3'                 |                  |                                      |
| <b><i>NNAT:TSS- DMR</i></b><br>(Murphy, et al., 2012) | Forward:<br>5'-TAAATTTGTAGGTTAGGGATTGGG-3'                 | 7                | chr20:36149<br>325-<br>36149543      |
|                                                       | Reverse:<br>5'- Biotin/CCAAAAAAAAAAAAAAAAATAATCCATCTACT-3' |                  |                                      |
|                                                       | Sequencing:<br>5'- TTGTAGGTTAGGGATTG-3'                    |                  |                                      |
| <b><i>RBI:Int2-DMR</i></b>                            | Forward:<br>5'- Biotin/ TGGGGTTAGGAGGTGAAAGTGG -3'         | 9                | chr13:48892<br>910-<br>48893147      |
|                                                       | Reverse:<br>5'-ACTACCCTACCCACCCCATATAA -3'                 |                  |                                      |
|                                                       | Sequencing:<br>5'-AACAAATCCCTTTCTACA -3'                   |                  |                                      |
| <b><i>NDN:TSS-DMR</i></b>                             | Forward:<br>5'-TGGGGGTTTAGGTTGTAAAGTTAG-3'                 | 6                | chr15:23932<br>310-<br>23932451      |
|                                                       | Reverse:<br>5'- Biotin/ CACTTCCTCTCCAAAAATCC -3'           |                  |                                      |
|                                                       | Sequencing:<br>5'- AGATTTTATTTTGTGTTTGATATG -3'            |                  |                                      |

The NNAT:TSS-DMR primers were previously reported in Murphy, S. K., Z. Huang and C. Hoyo. (2012), 'Differentially Methylated Regions of Imprinted Genes in Prenatal, Perinatal and Postnatal Human Tissues', *PLoS One* Vol. 7, No. 7, pp. e40924.
