# Supplementary material for: Co-Occurrence of Beckwith–Wiedemann Syndrome and Early-Onset Colorectal Cancer
Source: MDPI journal article supplement (doi:10.3390/cancers15071944), 2023-03-23
Supplement: s1 [file s1]

**Table S2.** Primers for amplification and Sanger sequencing of CFTR variants.

| Variant | Primers                                   | Coordinates of the amplified region in hg19 |
|---------|-------------------------------------------|---------------------------------------------|
| F1052V  | Forward:<br>5'- AGGTTGGGCTCAGATCTGTG -3'  | chr7:117304740-117304901                    |
|         | Reverse:<br>5'- GAGCACTGGGTTTCATCAAGC -3' |                                             |
| Q1352E  | Forward:<br>5'- TCAAAGAATGGCACCAGTGT -3'  | chr7:117251482-117251720                    |
|         | Reverse:<br>5'- TTCAAAGTAAGGCTGCCGTC -3'  |                                             |
